# Supplementary material
Source: publisher figshare collection journal article supplement (https://karger.figshare.com/ndownloader/files/27982377)
Supplement: Supplementary file 1 [file 27982377]

**Table S1.** Summary of available cytogenetic data, including this study, for the species of the Eumeninae subfamily. Chromosome morphology is cited according to published data, using classifications from *: Imai (1991) (A: acrocentric, M: metacentric) or †: Levan et al. (1964) (M: metacentric, SM: submetacentric and ST: subtelocentric)

| **Species** | **Localities** | **2n/ (n)** | **Karyotypic formulae** | **References** |
| --- | --- | --- | --- | --- |
| ***Ancistrocerus*** |  |  |  |  |
| *A. adiabatus* | California, USA | 12/(6) | 4M + 2SM† | Goodpasture (1974) |
| *A. japonicus* | Honshû, Japan | -/(12) | - | Nakatani (1988), cited in Yamane (1990) |
| *A. simulator* | California, USA | -/(7) | (6M + 1SM)† | Goodpasture (1974) |
| *Ancistrocerus* sp. | Viçosa, Brazil | -/(12) | (4M + 8ST)† | **Present study** |
| *A. spilogaster* | California, USA | -/(6) | (5M + 1SM/ST)† | Goodpasture (1974) |
| *A. tuberculiceps* | California, USA | 20/(10) | 8M + 2SM† | Goodpasture (1974) |
| *A. deusepilloserus* | Ohsato, Japan | 12/(6) | 6M* | Hoshiba and Imai (1993) |
| ***Anterynchium*** |  |  |  |  |
| *A. flavomarginatum* | Honshû, Japan | -/(6) | - | Nakatani (1988), cited in Yamane (1990) |
| ***Allodynerus*** |  |  |  |  |
| *A. mandschuricus* | Honshû, Japan | -/(8) | - | Nakatani (1988), cited in Yamane (1990) |
| ***Discoelius*** |  |  |  |  |
| *D. japonicus* | Honshû, Japan | 24/(12) | 10A + 2M* | Hoshiba and Imai (1993) |
| ***Euodynerus*** |  |  |  |  |
| *E. nipanicus* | Honshû, Japan | -/(5) | - | Nakatani (1988), cited in Yamane (1990) |
| *E. foraminatus* | California, USA | 16/- | - | Goodpasture (1974) |
| *E. quadrifasciatus* | Honshû, Japan | 10/(5) | 5M* | Hoshiba and Imai (1993) |
| ***Orancistrocerus*** |  |  |  |  |
| *O. drewseni* | Honshû, Japan | -/(14) | - | Nakatani (1988), cited in Yamane (1990) |

**Table S1. Cont.**

| **Species** | **Localities** | **2n/ (n)** | **Karyotipic formulae** | **References** |
| --- | --- | --- | --- | --- |
| ***Pachodynerus*** |  |  |  |  |
| *P. nasidens* | Viçosa, Brazil | 22/(11) | 16M + 6SM† | **Present study** |
| *P. grandis* | Viçosa, Brazil | 22/(11) | 20M + 2SM† | **Present study** |
| ***Rhynchium*** |  |  |  |  |
| *R. quinquecinctum* | Iriomonte Island, Japan  Amami Island, Japan | -/(15) | - | Nakatani (1988), cited in Yamane (1990) |
| ***Stenodynerus*** |  |  |  |  |
| *S. frauenfeldi* | Honshû, Japan | 20/(10) | 8A + 2M* | Hoshiba and Imai (1993) |
| *S. tokyanus* | Honshû, Japan | -/(18) | - | Nakatani (1988), cited in Yamane (1990) |
| ***Symmorphus*** |  |  |  |  |
| *S. apiciornatus* | Honshû, Japan | -/(4) | - | Nakatani (1988), cited in Yamane (1990) |
| *S. foveolatus* | Honshû, Japan | -/(5) | - | Nakatani (1988), cited in Yamane (1990) |

**Table S2**. Karymorphometrical analyses of *Ancistroceus* sp. male.All values (µm) represent an average obtained from 15 metaphases. S: short arm length; L: long arm length; TL: total length; r: arm ratio (= L/S); Chromosomal classification according to Levan et al. (1964)

| **Chromosomes** | **S** | **L** | **TL** | **r** | **Classification** |
| --- | --- | --- | --- | --- | --- |
| 1 | 4,18 ± 0,73 | 6,58 ± 0,94 | 10,76 ± 1,18 | 1,54 ± 0,07 | Metacentric |
| 2 | 3,60 ± 0,88 | 5,38 ± 0,74 | 8,98 ± 1,29 | 1,49 ± 0,13 | Metacentric |
| 3 | 1,83 ± 0,42 | 2,74 ± 0,60 | 4,61 ± 0,99 | 1,64 ± 0,15 | Metacentric |
| 4 | 1,43 ± 0,41 | 2,16 ± 0,68 | 3,59 ± 1,09 | 1,52 ± 0,04 | Metacentric |
| 5 | 0,73 ± 0,25 | 3,44 ± 0,70 | 4,17 ± 0,95 | 4,69 ± 0,61 | Subtelocentric |
| 6 | 0,70 ± 0,30 | 3,18 ± 0,77 | 3,88 ± 1,06 | 4,47 ± 0,57 | Subtelocentric |
| 7 | 0,81 ± 0,13 | 3,08 ± 0,69 | 3,89 ± 0,82 | 3,82 ± 0,32 | Subtelocentric |
| 8 | 0,75 ± 0,24 | 2,86 ± 0,65 | 3,61 ± 0,87 | 3,63 ± 0,49 | Subtelocentric |
| 9 | 0,65 ± 0,15 | 2,85 ± 0,58 | 3,50 ± 0,71 | 4,04 ± 0,42 | Subtelocentric |
| 10 | 0,68 ± 0,13 | 2,69 ± 0,62 | 3,38 ± 0,75 | 3,99 ± 0,23 | Subtelocentric |
| 11 | 0,66 ± 0,16 | 2,43 ± 0,48 | 3,09 ± 0,62 | 3,92 ± 0,74 | Subtelocentric |
| 12 | 0,63 ± 0,17 | 2,34 ± 0,34 | 2,98 ± 0,51 | 3,70 ± 0,43 | Subtelocentric |

**Table S3**. Karymorphometrical analyses of *Pachodynerus grandis* female. All values (µm) represent an average obtained from 15 metaphases. S: short arm length; L: long arm length; TL: total length; r: arm ratio (= L/S); Chromosomal classification according to Levan et al. (1964)

| **Chromosomes** | **S** | **L** | **TL** | **r** | **Classification** |
| --- | --- | --- | --- | --- | --- |
| 1 | 2.65 ± 0.19 | 3.06 ± 0.33 | 5.71 ± 0.48 | 1.10 ± 0.09 | Metacentric |
| 1 | 2.46 ± 0.25 | 2.95 ± 0.25 | 5.41 ± 0.41 | 1.12 ± 0.12 | Metacentric |
| 2 | 2.44 ± 0.26 | 2.97 ± 0.33 | 5.41 ± 0.53 | 1.13 ± 0.10 | Metacentric |
| 2 | 2.03 ± 0.41 | 2.84 ± 0.24 | 4.88 ± 0.63 | 1.26 ± 0.14 | Metacentric |
| 3 | 2.22 ± 0.29 | 2.64 ± 0.16 | 4.86 ± 0.43 | 1.12 ± 0.10 | Metacentric |
| 3 | 2.21 ± 0.20 | 2.61 ± 0.30 | 4.82 ± 0.51 | 1.17 ± 0.03 | Metacentric |
| 4 | 2.07 ± 0.20 | 2.61 ± 0.27 | 4.67 ± 0.40 | 1.19 ± 0.13 | Metacentric |
| 4 | 1.96 ± 0.33 | 2.37 ± 0.42 | 4.47 ± 0.60 | 1.07 ± 0.23 | Metacentric |
| 5 | 1.93 ± 0.23 | 2.50 ± 0.26 | 4.44 ± 0.49 | 1.25 ± 0.04 | Metacentric |
| 5 | 1.76 ± 0.27 | 2.53 ± 0.30 | 4.36 ± 0.53 | 1.35 ± 0.13 | Metacentric |
| 6 | 1.81 ± 0.15 | 2.36 ± 0.33 | 4.19 ± 0.43 | 1.23 ± 0.14 | Metacentric |
| 6 | 1.77 ± 0.11 | 2.25 ± 0.46 | 4.02 ± 0.57 | 1.27 ± 0.17 | Metacentric |
| 7 | 1.59 ± 0.21 | 2.09 ± 0.33 | 3.72 ± 0.52 | 1.23 ± 0.09 | Metacentric |
| 7 | 1.63 ± 0.09 | 2.02 ± 0.33 | 3.65 ± 0.38 | 1.22 ± 0.18 | Metacentric |
| 8 | 1.67 ± 0.05 | 1.95 ± 0.39 | 3.63 ± 0.40 | 1.16 ± 0.24 | Metacentric |
| 8 | 1.44 ± 0.09 | 1.90 ± 0.16 | 3.34 ± 0.25 | 1.32 ± 0.09 | Metacentric |
| 9 | 1.35 ± 0.23 | 1.80 ± 0.19 | 3.15 ± 0.40 | 1.25 ± 0.13 | Metacentric |
| 9 | 1.54 ± 0.05 | 1.79 ± 0.13 | 3.34 ± 0.17 | 1.16 ± 0.06 | Metacentric |
| 10 | 1.24 ± 0.05 | 1.64 ± 0.25 | 2.88 ± 0.23 | 1.31 ± 0.22 | Metacentric |
| 10 | 1.33 ± 0.06 | 1.73 ± 0.16 | 3.11 ± 0.12 | 1.25 ± 0.17 | Metacentric |
| 11 | 1.34 ± 0.21 | 2.96 ± 0.54 | 4.30 ± 0.71 | 2.05 ± 0.26 | Submetacentric |
| 11 | 1.27 ± 0.18 | 3.03 ± 0.48 | 4.50 ± 0.60 | 2.16 ± 0.35 | Submetacentric |

**Table S4**. Karymorphometrical analyses of *Pachodynerus grandis* male. All values (µm) represent an average obtained from 15 metaphases. S: short arm length; L: long arm length; TL: total length; r: arm ratio (= L/S); Chromosomal classification according to Levan et al. (1964)

| **Chromosomes** | **S** | **L** | **TL** | **r** | **Classification** |
| --- | --- | --- | --- | --- | --- |
| 1 | 2.84 ± 0.56 | 3.41 ± 0.64 | 6.25 ± 1.19 | 1.17 ± 0.04 | Metacentric |
| 2 | 2.71 ± 0.60 | 3.16 ± 0.50 | 5.83 ± 1.07 | 1.13 ± 0.12 | Metacentric |
| 3 | 2.44 ± 0.49 | 3.12 ± 0.68 | 5.56 ± 1.17 | 1.27 ± 0.06 | Metacentric |
| 4 | 2.31 ± 0.57 | 2.82 ± 0.49 | 5.13 ± 1.05 | 1.16 ± 0.10 | Metacentric |
| 5 | 2.07 ± 0.33 | 2.62 ± 0.33 | 4.55 ± 0.60 | 1.27 ± 0.18 | Metacentric |
| 6 | 1.85 ± 0.24 | 2.49 ± 0.37 | 4.32 ± 0.61 | 1.37 ± 0.04 | Metacentric |
| 7 | 1.86 ± 0.35 | 2.26 ± 0.32 | 4.08 ± 0.61 | 1.33 ± 0.19 | Metacentric |
| 8 | 1.81 ± 0.30 | 2.28 ± 0.34 | 3.96 ± 0.57 | 1.28 ± 0.21 | Metacentric |
| 9 | 1.57 ± 0.30 | 1.97 ± 0.46 | 3.54 ± 0.75 | 1.31 ± 0.08 | Metacentric |
| 10 | 1.49 ± 0.13 | 1.90 ± 0.30 | 3.40 ± 0.38 | 1.25 ± 0.17 | Metacentric |
| 11 | 1.38 ± 0.20 | 3.27 ± 0.40 | 4.66 ± 0.59 | 2.32 ± 0.07 | Submetacentric |

**Table S5**. Karymorphometrical analyses of *Pachodynerus nasidens* female. All values (µm) represent an average obtained from 15 metaphases. S: short arm length; L: long arm length; TL: total length; r: arm ratio (= L/S); Chromosomal classification according to Levan et al. (1964)

| **Chromosomes** | **S** | **L** | **TL** | **r** | **Classification** |
| --- | --- | --- | --- | --- | --- |
| 1 | 2.71 ± 0.27 | 2.94 ± 0.35 | 5.65 ± 0.61 | 1.09 ± 0.05 | Metacentric |
| 1 | 2.22 ± 0.18 | 2.48 ± 0.18 | 4.70 ± 0.31 | 1.12 ± 0.09 | Metacentric |
| 2 | 1.83 ± 0.18 | 2.22 ± 0.24 | 4.06 ± 0.42 | 1.21 ± 0.03 | Metacentric |
| 2 | 1.85 ± 0.10 | 2.34 ± 0.18 | 4.19 ± 0.27 | 1.27 ± 0.03 | Metacentric |
| 3 | 1.62 ± 0.20 | 2.19 ± 0.35 | 3.82 ± 0.54 | 1.35 ± 0.07 | Metacentric |
| 3 | 1.48 ± 0.26 | 2.21 ± 0.31 | 3.69 ± 0.57 | 1.50 ± 0.07 | Metacentric |
| 4 | 1.61 ± 0.15 | 2.03 ± 0.30 | 3.64 ± 0.34 | 1.26 ± 0.14 | Metacentric |
| 4 | 1.62 ± 0.12 | 1.99 ± 0.23 | 3.60 ± 0.35 | 1.23 ± 0.05 | Metacentric |
| 5 | 1.30 ± 0.12 | 1.95 ± 0.29 | 3.28 ± 0.41 | 1.53 ± 0.08 | Metacentric |
| 5 | 1.24 ± 0.15 | 2.00 ± 0.31 | 3.24 ± 0.47 | 1.61 ± 0.05 | Metacentric |
| 6 | 1.32 ± 0.11 | 1.92 ± 0.16 | 3.24 ± 0.26 | 1.46 ± 0.04 | Metacentric |
| 6 | 1.32 ± 0.23 | 1.86 ± 0.18 | 3.18 ± 0.19 | 1.41 ± 0.14 | Metacentric |
| 7 | 1.27 ± 0.19 | 1.67 ± 0.21 | 2.94 ± 0.40 | 1.32 ± 0.06 | Metacentric |
| 7 | 1.24 ± 0.22 | 1.61 ± 0.22 | 2.85 ± 0.41 | 1.30 ± 0.07 | Metacentric |
| 8 | 1.24 ± 0.15 | 1.52 ± 0.18 | 2.76 ± 0.37 | 1.23 ± 0.04 | Metacentric |
| 8 | 1.20 ± 0.26 | 1.53 ± 0.16 | 2.73 ± 0.41 | 1.29 ± 0.15 | Metacentric |
| 9 | 1.25 ± 0.23 | 2.44 ± 0.30 | 3.69 ± 0.52 | 1.97 ± 0.14 | Submetacentric |
| 9 | 1.22 ± 0.20 | 2.42 ± 0.26 | 3.66 ± 0.45 | 2.01 ± 0.14 | Submetacentric |
| 10 | 1.12 ± 0.17 | 2.52 ± 0.32 | 3.64 ± 0.50 | 2.25 ± 0.10 | Submetacentric |
| 10 | 1.11 ± 0.18 | 2.41 ± 0.28 | 3.51 ± 0.47 | 2.18 ± 0.10 | Submetacentric |
| 11 | 0.77 ± 0.20 | 2.03 ± 0.21 | 2.80 ± 0.40 | 2.75 ± 0.57 | Submetacentric |
| 11 | 0.76 ± 0.16 | 1.48 ± 0.26 | 2.24 ± 0.42 | 1.95 ± 0.12 | Submetacentric |

**Table S6**. Karymorphometrical analyses of *Pachodynerus nasidens* male. All values (µm) represent an average obtained from 15 metaphases. S: short arm length; L: long arm length; TL: total length; r: arm ratio (= L/S); Chromosomal classification according to Levan et al. (1964)

| **Chromosomes** | **S** | **L** | **TL** | **r** | **Classification** |
| --- | --- | --- | --- | --- | --- |
| 1 | 1.91 ± 0.24 | 2.98 ± 0.54 | 4.89 ± 0.78 | 1.50 ± 0.12 | Metacentric |
| 2 | 1.94 ± 0.19 | 2.67 ± 0.53 | 4.71 ± 0.68 | 1.31 ± 0.19 | Metacentric |
| 3 | 1.90 ± 0.37 | 2.52 ± 0.21 | 4.42 ± 0.57 | 1.33 ± 0.17 | Metacentric |
| 4 | 1.87 ± 0.31 | 2.43 ± 0.35 | 4.35 ± 0.64 | 1.42 ± 0.10 | Metacentric |
| 5 | 1.63 ± 0.26 | 2.41 ± 0.43 | 4.04 ± 0.69 | 1.52 ± 0.05 | Metacentric |
| 6 | 1.50 ± 0.24 | 2.12 ± 0.24 | 3.61 ± 0.49 | 1.42 ± 0.08 | Metacentric |
| 7 | 1.66 ± 0.26 | 1.83 ± 0.27 | 3.49 ± 0.53 | 1.19 ± 0.06 | Metacentric |
| 8 | 1.39 ± 0.04 | 1.68 ± 0.11 | 3.06 ± 0.07 | 1.22 ± 0.10 | Metacentric |
| 9 | 1.38 ± 0.19 | 2.72 ± 0.31 | 4.13 ± 0.50 | 2.02 ± 0.08 | Submetacentric |
| 10 | 1.13 ± 0.12 | 2.83 ± 0.33 | 3.97 ± 0.44 | 2.49 ± 0.05 | Submetacentric |
| 11 | 0.89 ± 0.09 | 2.10 ± 0.29 | 2.99 ± 0.38 | 2.22 ± 0.16 | Submetacentric |
